# Supplementary material for: Evolution of kaiA, a key circadian gene of cyanobacteria
Source: PubMed Central journal article supplement (PMC8113500; doi:10.1038/s41598-021-89345-7), 2021-05-11
Supplement: 41598_2021_89345_MOESM1_ESM.pdf [file 41598_2021_89345_MOESM1_ESM.pdf]

# Evolution of *kaiA*, a key circadian gene of cyanobacteria

Volodymyr Dvornyk<sup>1,\*,#</sup>, Qiming Mei<sup>2,3,\*</sup>

<sup>1</sup> Department of Life Sciences, College of Science and General Studies, Alfaisal University, Riyadh 11533, Kingdom of Saudi Arabia

<sup>2</sup> Southern Marine Science and Engineering Guangdong Laboratory (Guangzhou), Guangzhou, People's Republic of China

<sup>3</sup> Key Laboratory of Vegetation Restoration and Management of Degraded Ecosystems, South China Botanical Garden, Chinese Academy of Sciences, Guangzhou, People's Republic of China

\* The authors contributed equally to the paper

# Correspondence to [vdvornyk@alfaisal.edu](mailto:vdvornyk@alfaisal.edu)

- Nostocales
- Synechococcales
- Oscillatoriophyceidae
- Chroococciopsidales
- Pleurocapsales
- Spirulinales
- Unidentified
- Outgroup

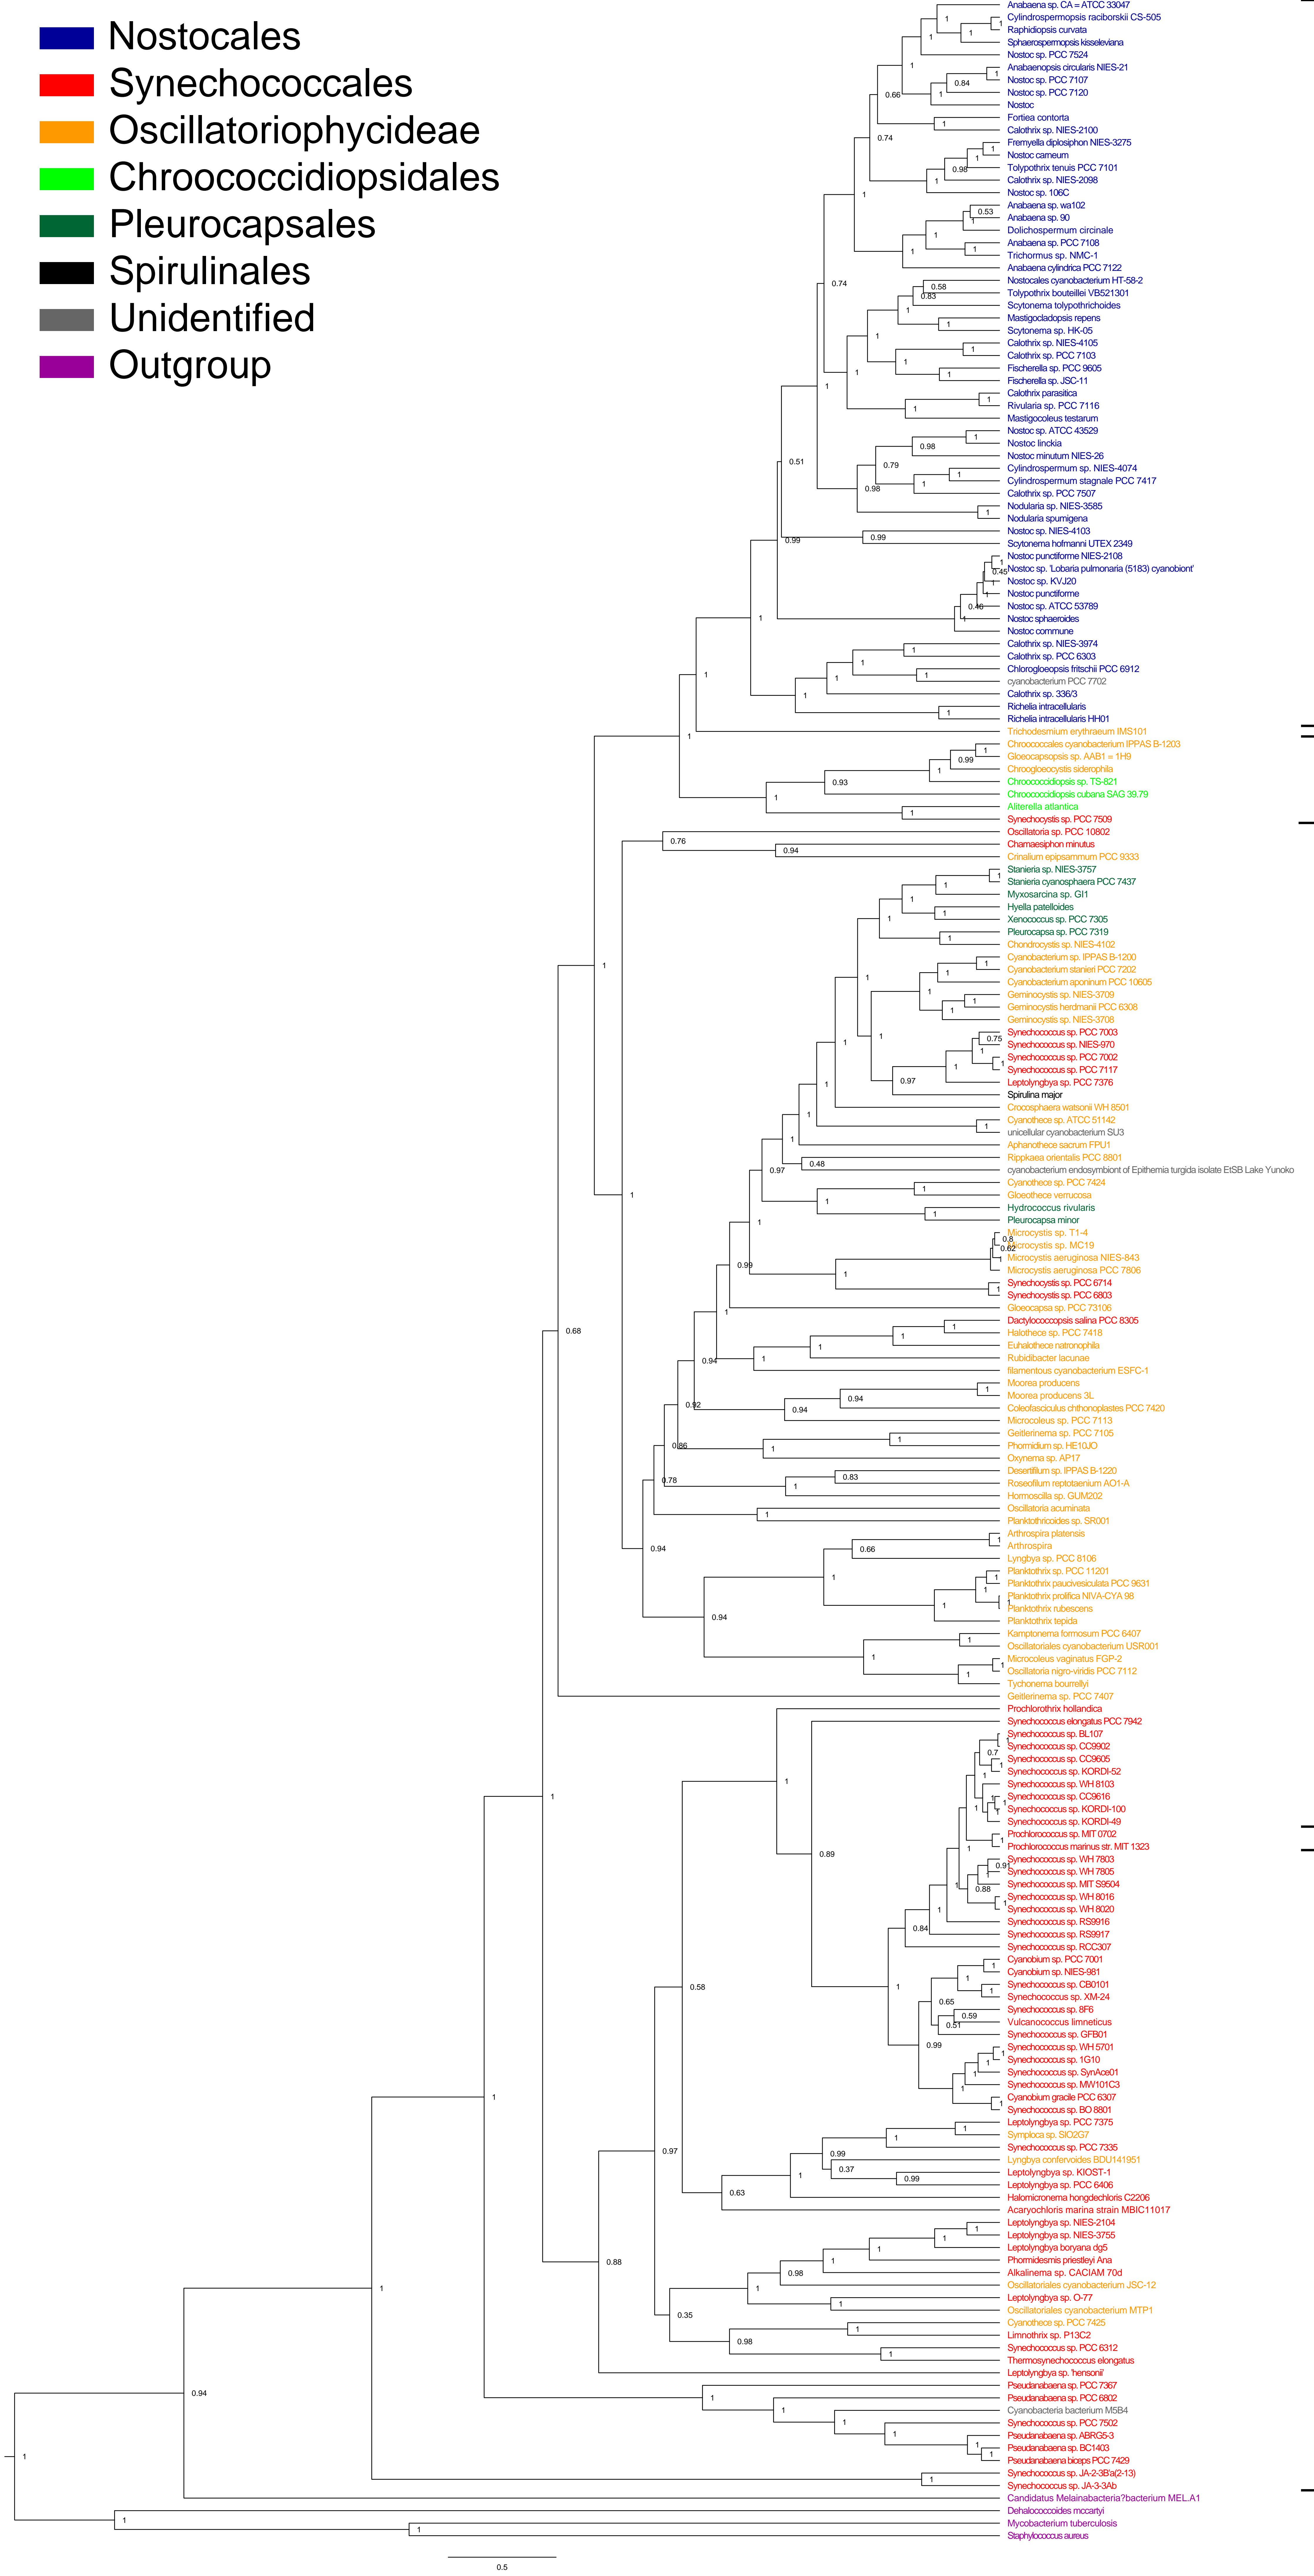

Single-domain KaiA

Double-domain KaiA  
Single-domain KaiA

Double-domain KaiA

*Prochlorococcus* KaiA

Double-domain KaiA

Figure S1. (a) Bayesian tree with uncorrelated log-normal clock of the 16S and 23S rRNA genes.

■ Single-domain KaiA  
■ Double-domain KaiA  
■ *Prochlorococcus* KaiA

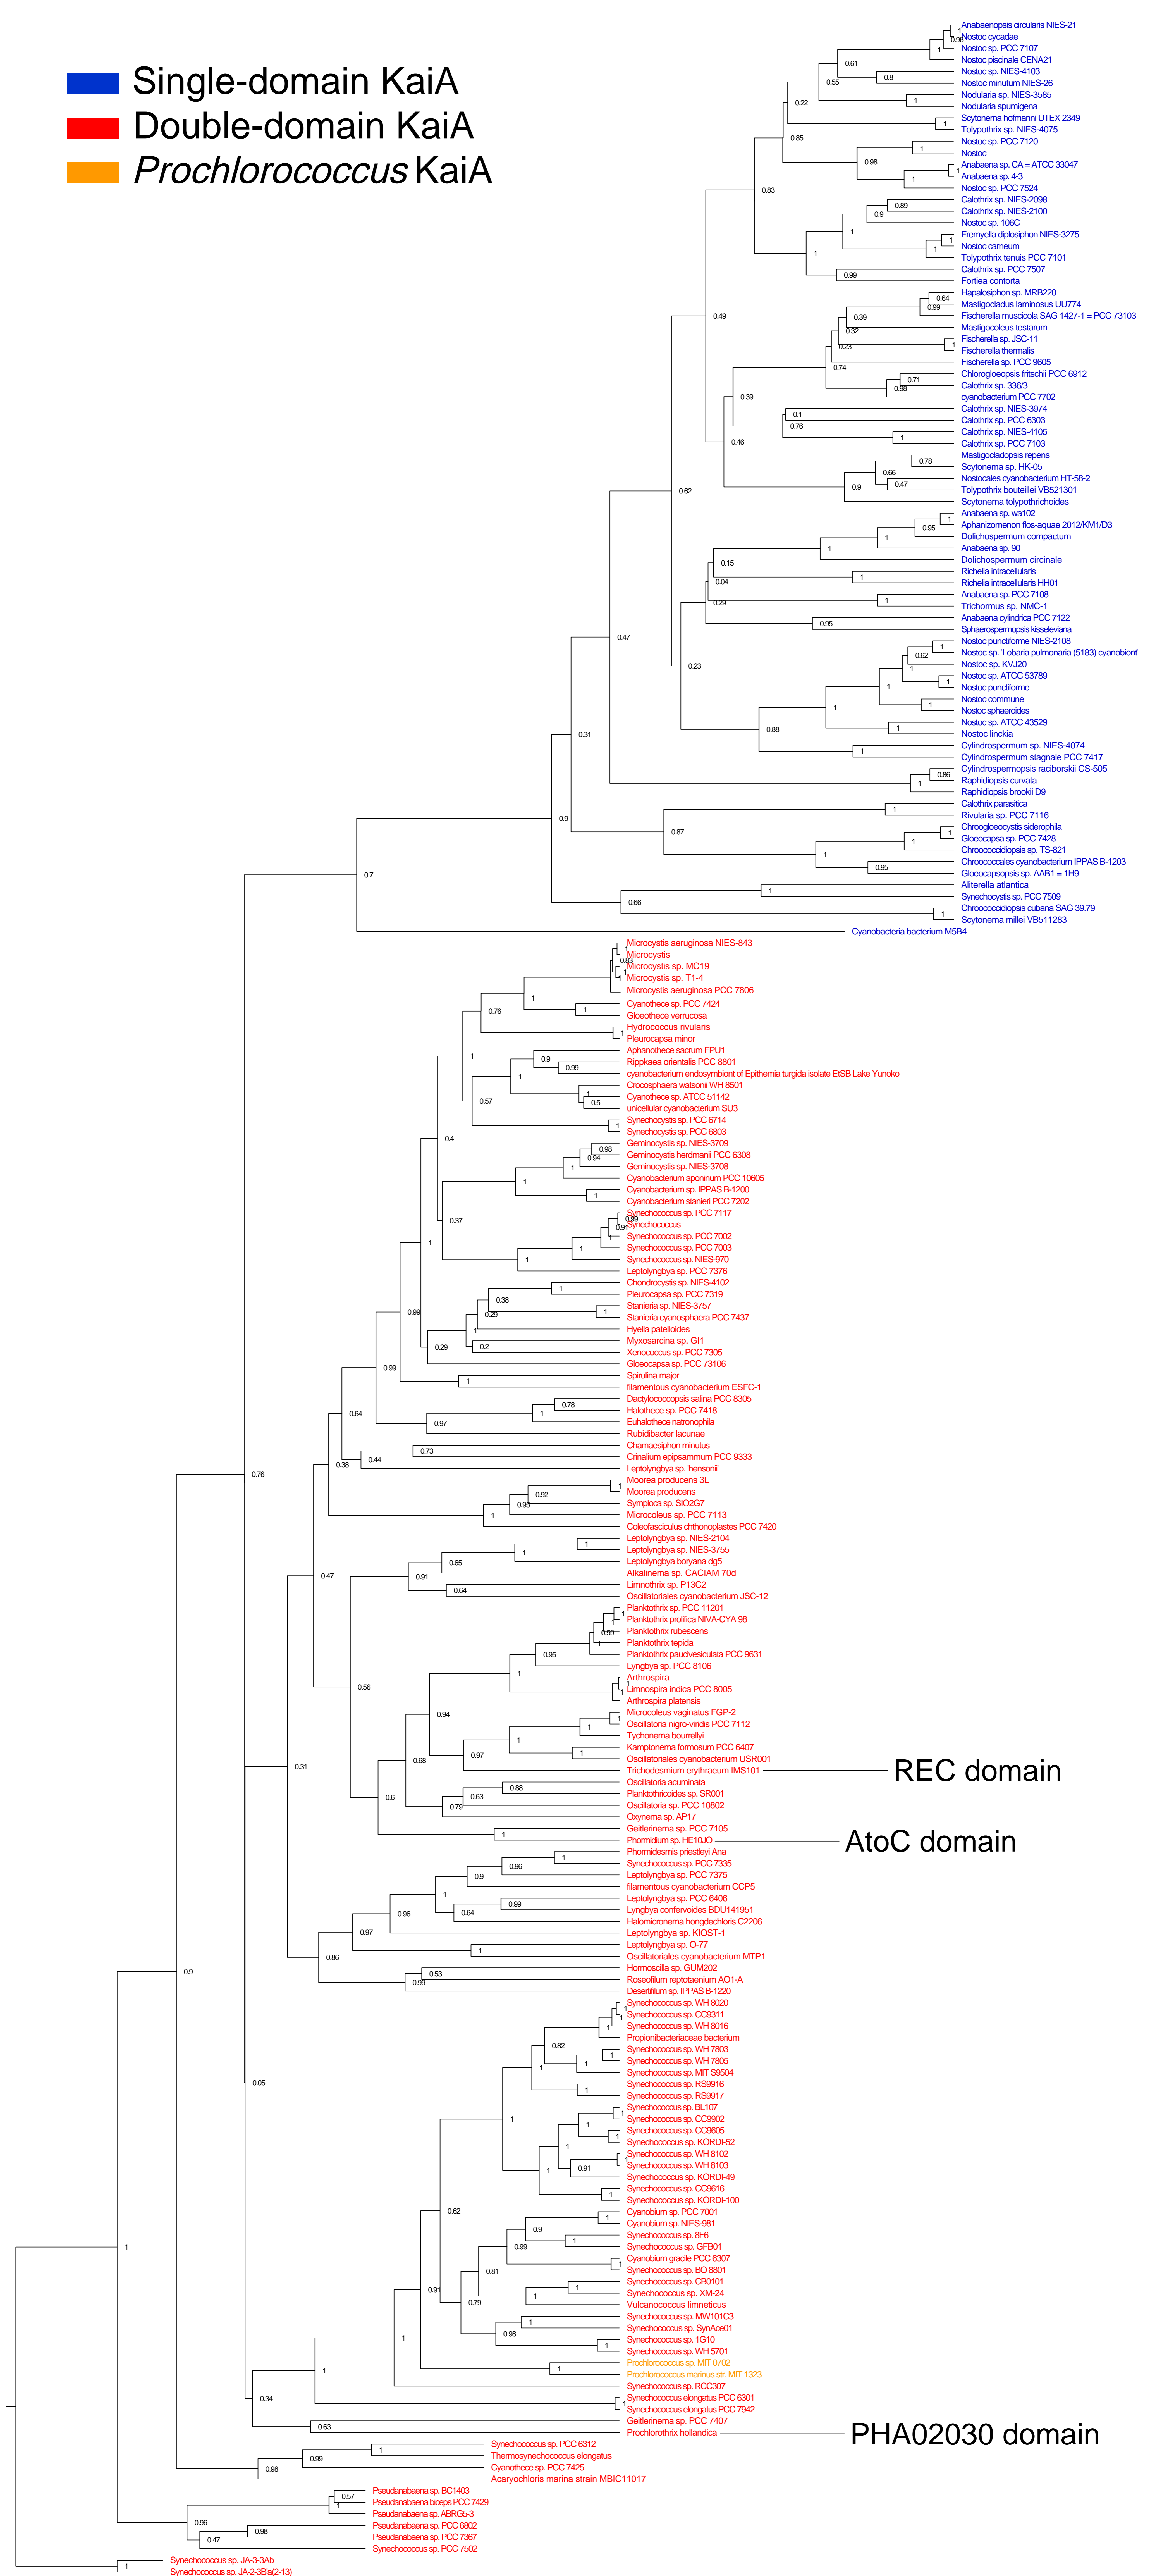

Figure S1. (b) Bayesian tree with uncorrelated log-normal clock of the KaiA proteins.

- Nostocales
- Synechococcales
- Oscillatoriophyceae
- Chroococciopsidales
- Pleurocapsales
- Spirulinales
- Outgroup

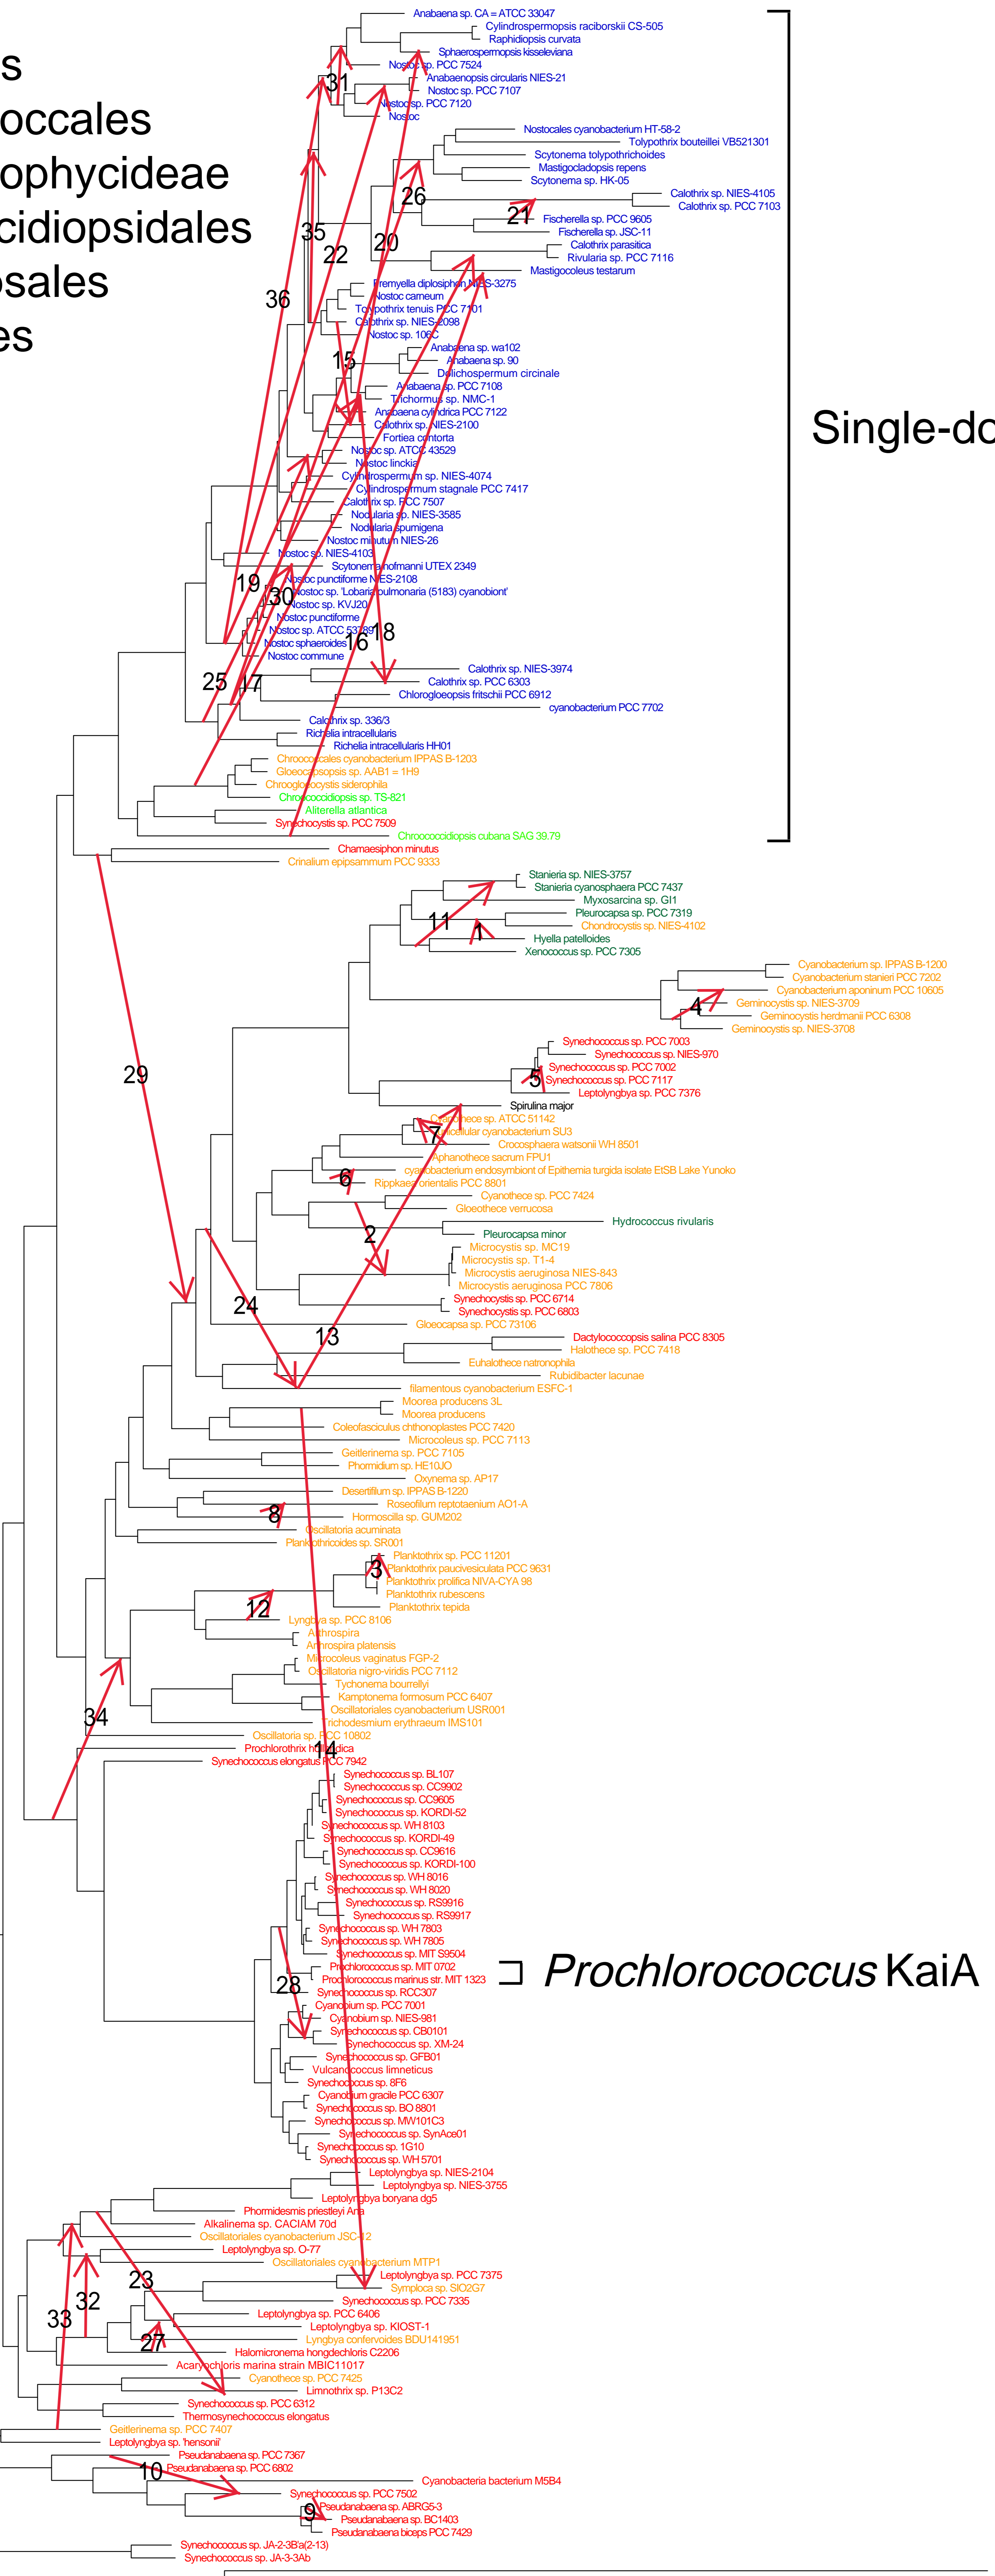

Single-domain KaiA

Double-domain KaiA

*Prochlorococcus* KaiA

Figure S2. HGTs having occurred in the evolution of the *kaiA* genes.



0017):0.04538799999999984,(Kampt6407:0.02399599999999906,Oscil001:0.0172  
10999999999865):0.06069700000000022):0.07071699999999992,Trich101:0.14069  
100000000012):0.01850799999999997):0.02196700000000007):0.016974999999999  
962,Oscil10802:0.13808299999999996):0.025380999999999876,((((((((((((((Nosto  
582:0.05171099999999984,Tolyp1301:0.14355000000000007):0.0099700000000000  
34,Scytotoly:0.070992999999999986):0.009341999999999961,(Mastirepe:0.05907200  
000000001,ScytoHK05:0.052007000000000136):0.024938999999999822):0.035144  
99999999998,((Calot4105:0.025354999999999794,Calot7103:0.03230299999999975  
):0.18423300000000001,(Fisch9605:0.05275200000000013,FischJSC11:0.066150000  
00000015):0.04537599999999986):0.024810999999999916):0.01941199999999985  
,((Calotpara:0.012669000000000041,Rivul7116:0.00982100000000008):0.10145599  
999999999,Mastitest:0.07887299999999997):0.052373):0.046035000000000005,((((  
Cylin505:0.0040250000000000167,Raphicurv:0.006772):0.06270899999999999,Sphae  
kiss:0.025359999999999827):0.034517000000000013,Anaba33047:0.0379110000000  
0003):0.012561999999999962,Nosto7524:0.028993999999999964):0.01360699999  
999925,((AnabaN21:0.0071569999999999858,Nosto7107:0.008375000000000021):0  
.047595000000000054,Nosto7120:0.0125249999999999897):0.009498000000000006,  
Nostoc:0.0312740000000000024):0.011333999999999955):0.0109520000000000073):  
0.009109999999999951,((((Fremy3275:0.0116319999999999865,Nostocarn:0.011574  
9999999999891):0.0111440000000000043,Tolyp7101:0.0072159999999999889):0.0097  
10000000000107,Calot2098:0.016997000000000015):0.0049759999999999869,Nostoc  
106:0.03258999999999999):0.0113900000000000011):0.0032780000000000114,((((An  
aba102:0.01204400000000000166,Anaba90:0.0260740000000000153):0.007383999999  
999835,Doliccirc:0.025366999999999917):0.042153000000000011,(Anaba7108:0.018  
945999999999907,TrichN1:0.014051999999999953):0.0126340000000000034):0.012  
855999999999979,Anaba7122:0.0257810000000000054):0.0205260000000000044,(Ca  
lot2100:0.0323740000000000125,Forticont:0.039918000000000012):0.0133950000000  
00046):0.007476999999999956):0.014896999999999938,(Nosto43529:0.017195000  
00000007,Nostolinc:0.020963999999999983):0.0306960000000000057):0.007139000  
0000000065,((Cylin4074:0.023009999999999975,Cylin7417:0.03551199999999999)  
:0.0128849999999999813,Calot7507:0.03673499999999996):0.0109760000000000097  
):0.0016599999999999948,((Nodul3585:0.009519999999999973,Nodulspum:0.0089  
329999999999858):0.04406599999999994,NostoN26:0.0324670000000000024):0.003  
16500000000000844):0.057449000000000008,(Nosto4103:0.03947199999999995,Scyt  
o2349:0.086386999999999977):0.0107780000000000176):0.0046919999999999185,(((  
((Nosto2108:0.003149999999999986,NostoLoba:0.0102739999999999894):0.005627  
999999999966,NostoK20:0.011905999999999972):0.0017920000000000158,Nostop  
unc:0.003706999999999905):0.005006999999999984,Nosto53789:0.0021919999999  
999717):0.009118000000000182,Nostospha:0.0068510000000001625):0.004043999  
9999999365,Nostocomm:0.0141510000000000025):0.03181499999999993):0.018140  
000000000045,(((Calot3974:0.129513,Calot6303:0.09468199999999993):0.0439849  
9999999994,(Chlor6912:0.047648999999999983,cyano7702:0.17896299999999998):  
0.065252000000000009):0.0180530000000000097,Calot3363:0.05250200000000005):  
0.019223999999999908,(Riche:0.0172429999999999897,Riche01:0.04135499999999  
981):0.051692000000000007):0.028513000000000001):0.05856799999999995,((((Chr  
oo1203:0.014550999999999998,Gleo1H9:0.0138850000000000147):0.014185999999  
99981,Chrooside:0.0186819999999999865):0.0063450000000000045,Chroo821:0.0368  
6300000000009):0.064502000000000006,(Aliteatla:0.070832,Synec7509:0.04477699  
9999999845):0.0533730000000000115):0.014453000000000005,Chrooc3979:0.219737  
00000000007):0.0167059999999999888):0.039211000000000011,(Chamaminu:0.1900

71000000001,Crina9333:0.14634599999999987):0.03319000000000005):0.014681  
999999999862):0.028625000000000123,((((((((((Synec107:5.710000000000992E-  
4,Synec9902:5.770000000000497E-  
4):0.012881999999999838,(Synec9605:0.00370599999999987,SynecK52:0.003279  
999999999496):0.0028569999999998874):0.006121000000000043,Synec8103:2.00  
00000000575113E-  
6):0.004210999999999965,SynecK49:0.005831999999999837):0.002763000000000  
071,(Synec9616:0.0037730000000000263,SynecK100:0.005552000000000001):0.01  
6820999999999975):0.006929000000000185,(((Synec8016:9.200000000000319E-  
4,Synec8020:0.002539000000000069):0.008448000000000011,(Synec9916:0.01603  
2000000000046,Synec9917:0.022670999999999886):0.011249000000000065):0.003  
0879999999999797,((Synec7803:0.0031049999999999134,Synec7805:0.005081999  
999999809):0.0021420000000000883,Synec9504:0.020415999999999999):0.0016540  
000000000443):0.004717000000000082):0.008153999999999773,(Proch:0.0080690  
00000000104,Proch1323:0.0012590000000001211):0.02135699999999985):0.01394  
6000000000236,Synec307:0.032313000000000036):0.014489999999999892,(((Cya  
no7001:0.0030630000000000038,Cyano981:0.015710000000000113):0.01252699999  
9999955,(Synec0101:0.00687999999999997,SynecXM24:0.02036500000000019):0.  
.02182799999999996):0.007020000000000026,((SynecGFB01:0.02297300000000001  
32,Vulcalimn:0.011415000000000175):0.004368999999999845,Synec8F6:0.011320  
999999999914):0.004231000000000096):0.007913999999999977,(((Synec1G10:0.0  
01867000000000063,Synec5701:0.003992999999999913):0.006874000000000047,S  
ynecAce01:0.027679999999999927):0.007779999999999898,Synec101C3:0.014207  
00000000008):0.005397000000000096,(Cyano6307:0.004525000000000112,Synec8  
801:0.002637000000000005):0.018351000000000006):0.010205999999999937):0.  
014718000000000009):0.13145799999999985,Synec7942:0.085874):0.02361400000  
0000024,Prochholl:0.13842899999999999):0.04639300000000013):0.018405999999  
99922,(((((((Lepto2104:0.02586899999999992,Lepto3755:0.03779399999999988):0.  
.03458800000000006,Leptodg5:0.018863000000000074):0.119977,PhormAna:0.070  
724999999999993):0.03733999999999993,Alkal70d:0.073291):0.0268540000000001  
56,Oscil12:0.096638):0.014873999999999832,(LeptoO77:0.09857399999999994,Os  
cilMTP1:0.142552):0.03245100000000001):0.03163000000000005,((((Lepto7375:  
0.030159999999999965,Symp2G7:0.039339000000000001):0.11689100000000008,S  
ynec7335:0.11375400000000013):0.051012999999999975,(Lepto6406:0.065487999  
9999999,LeptoK1:0.111429):0.02547300000000008):0.01198399999999995,Lyng  
b1951:0.14517599999999997):0.02052799999999988,Halom2206:0.103571999999  
9978):0.04458500000000001,AcaryMBIC:0.09680700000000009):0.02564100000000  
0025):0.007701999999999876,((Cyano7425:0.10349699999999995,Limno13C2:0.15  
368099999999996):0.07342599999999999,(Synec6312:0.0659479999999999,Therm  
elon:0.061879999999999935):0.05715399999999993):0.016897000000000162):0.01  
3405000000000111):0.010240999999999945,(Geitl7407:0.08715600000000001,Lept  
ohens:0.08679999999999999):0.00840900000000011):0.04255199999999992,((((P  
seud1403:0.017789000000000055,Pseud7429:0.009495000000000031):0.009034999  
999999904,PseudG53:0.00809999999999996):0.10124400000000011,Synec7502:0.  
08362800000000004):0.033374000000000015,cyanoM5B4:0.2324520000000001):0.  
04724399999999984,Pseud6802:0.056391999999999776):0.03617500000000007,Ps  
eud7367:0.10299999999999998):0.09531100000000015):0.0374785,(((Staph:0.6670  
930000000002,Mycob:1.16699):0.09794199999999997,Dehal:1.052419):0.223487,  
Melai:0.73946099999999999):0.22910199999999992,(Synec23Ba:0.03510900000000

006,Synec33Ab:0.0384880000000008):0.23989399999999983):0.0374785000000000164);

Gene Tree :

((Synec23Ba:0.1322000000000001,Synec33Ab:0.10483299999999973):0.4171739999999999,(((Synec7502:0.5461069999999997,(Pseud6802:0.3553169999999999,Pseud7367:0.6095669999999997):0.12627299999999986):0.09175700000000031,(cyanoM5B4:2.8439540000000005,(Pseud7429:0.06435000000000013,(Pseud1403:0.06838200000000016,PseudG53:0.0997110000000001):0.012630999999999837):0.293307):0.17974399999999999):0.26782099999999964,((AcaryMBIC:0.48994799999999996,(Cyano7425:0.27981300000000076,(Synec6312:0.47002999999999995,Thermelon:0.4092720000000001):0.2559320000000005):0.11190399999999912):0.10226100000000038,((Coleo7420:0.24035100000000043,(Micro7113:0.21585699999999974,(Simp2G7:0.24432300000000005,(Moore3L:0.031393000000000004,Mooreprod:0.009848999999999997):0.34338300000000002):0.045220999999999734):0.05739900000000002):0.18038400000000001,(((LeptoO77:0.35592399999999999,OscilMTP1:0.37002899999999997):0.174139000000000027,(LeptoK1:0.87769200000000001,((Lepto6406:0.38480900000000002,Lyngb1951:0.501296):0.13492600000000001,(Halom2206:0.26291900000000001,(Lepto7375:0.364435999999999954,(PhormAna:0.26383899999999993,Synec7335:0.24272799999999996):0.18733500000000003):0.17924700000000016):0.04281700000000033):0.11429899999999993):0.17849499999999985):0.06521400000000001,(((Aliteatla:0.82132199999999999,Synec7509:0.71668099999999999):0.486569000000000025,(Chrooc3979:0.759792,Mastitest:0.984423):0.06510600000000011):0.06809799999999999,(((Calotpara:0.180477000000000022,Rivul7116:0.21242500000000009):0.81464999999999999,((Chroo1203:0.125843999999999984,Gleo1H9:0.417354):0.14113400000000001,(Chroo821:0.10440000000000005,Chrooside:0.16507300000000003):0.277701):0.49246899999999998):0.204486000000000017,((Cylin505:0.0152990000000000174,Raphicurv:0.11407999999999996):1.29330200000000002,(((Anaba7122:0.61179499999999999,Sphaekiss:0.293610999999999984):0.125432,(Doliccir:0.343532999999999987,(Anaba102:0.214297999999999988,Anaba90:0.32576299999999998):0.21353499999999998):0.23462100000000002):0.033770000000000008,((Calot6303:0.80338699999999999,(Anaba7108:0.25245499999999999,TrichN1:0.10693300000000017):0.139030999999999968):0.0290470000000000267,(Calot3974:1.08779099999999997,(Riche:0.428293000000000003,Riche01:0.41864800000000013):0.36844100000000024):0.241311000000000005):0.058864999999999945):0.09740700000000002,((Cylin4074:0.177031999999999963,Cylin7417:0.236652999999999956):0.13011700000000026,(((Nosto43529:0.23707700000000002,Nostolinc:0.12217199999999995):0.185645999999999976,((Nostocomm:0.075527000000000012,Nostospha:0.07948200000000005):0.084264000000000012,((Nosto53789:0.061408000000000013,Nostopunc:0.01021900000000002):0.079023999999999998,(NostoK20:0.095702000000000018,(Nosto2108:0.03602799999999995,NostoLoba:0.08365599999999995):0.06418500000000016):0.0150130000000000165):0.049370000000000136):0.102262999999999977):0.134822999999999992,(((Calot7507:0.25295699999999999,Forticont:0.40529599999999999):0.04325599999999996,((Nostoc106:0.09737799999999996,(Calot2098:0.20826000000000001,Calot2100:0.356898999999999986):0.066971999999999981):0.05596800000000002,(Tolyp7101:0.040890000000000009,(Fremy3275:0.0273889999999999886,Nostocarn:0.038584999999999987):0.05576099999999995):0.372755000000000017):0.121144999999999984):0.153902999999999968,(((Anaba33047:0.12705399999999997



8,Nosto7524:0.16546100000000008):0.09989200000000009,(Nosto7120:0.02224899  
9999999963,Nostoc:0.25870099999999985):0.25558000000000014):0.2315380000  
000002,((Nodul3585:0.18793900000000008,Nodulspum:0.04205099999999984):0.1  
6241500000000002,((AnabaN21:0.017443999999999793,Nosto7107:0.027041999999  
99979):0.30296600000000007,(Nosto4103:0.36146900000000004,NostoN26:0.1241  
9700000000011):1.999999998354667E-  
6):0.04256200000000021):0.02156799999999981):0.04863099999999987,(Scyto234  
9:0.16295899999999985,(Scytotoly:0.36178500000000025,((Mastirepe:0.14827499  
999999993,ScytoHK05:0.07001800000000014):0.06230700000000011,(Nosto582:0.  
08651300000000006,Tolyp1301:0.16400099999999984):0.01545599999999914):0.  
05419600000000013,(FischJSC11:0.161451,((Calot3363:0.21580500000000002,(Chl  
or6912:0.051304000000000016,cyano7702:0.461948):0.026746999999999854):0.08  
1442000000000001,(Fisch9605:0.02129000000000003,(Calot4105:0.13546600000000  
01,Calot7103:0.37955799999999984):0.4471959999999999):0.08452899999999985)  
:0.06096900000000005):0.14543600000000012):0.01819199999999986):0.103682  
00000000005):0.05037599999999976):0.06064199999999964):0.15304800000000  
07):0.040923000000000265):0.09063299999999996):0.14144500000000004):0.1267  
8400000000023):0.10294899999999974):0.81504400000000003):0.03790599999999  
55,((Deser1220:0.30520999999999976,(Horm202:0.58514500000000002,RoseoAO1  
A:0.46960600000000002):0.06444399999999995):0.12780199999999997,(Geitl7407:  
0.54894100000000001,(Oscil12:0.358680000000000055,(Limno13C2:0.762937999999  
9997,(Alkal70d:0.48121499999999997,(Leptodg5:0.223684,(Lepto2104:0.121676000  
00000034,Lepto3755:0.10420800000000003):0.18852799999999998):0.152123999999  
9997):0.07006200000000007):0.07114300000000018):0.07629100000000033):0.016  
6409999999999906):0.08330199999999977,((Leptohens:0.34864999999999924,((Cha  
maminu:0.72532100000000005,Crina9333:0.37918300000000027):0.09777899999999  
9917,((Rubila:1.17341000000000005,(Euhalna:0.24254700000000007,(Dacty8305:0.1  
86030000000000014,Halot7418:0.18273800000000005):0.08260199999999962):0.428  
70400000000064):0.15664899999999982,((filamESFC1:0.52133500000000001,Spiru  
ma:0.38432099999999999):0.11648999999999976,(((Synec6714:0.03331000000000  
017,Synec6803:0.016942000000000235):0.502173,((AphanFPU1:0.17056100000000  
018,(endosEpith:0.43100199999999999,Rippk8801:0.10686399999999985):0.086972  
00000000027):0.06999699999999986,(uniceSU3:0.11209399999999992,(Croco8501  
:0.13422700000000001,Cyano51142:0.04802400000000029):0.005583000000000116  
):0.17984699999999965):0.12146900000000027):0.023189000000000348,((Hydrriv  
u:0.008944999999999759,Pleurmino:0.017742000000000147):0.21051200000000004  
8,((Cyano7424:0.08378700000000006,Gloeoverr:0.13135600000000025):0.1189939  
9999999982,(Micro7806:0.010930000000000106,(Micro843:0.01211699999999993  
3,(MicroMC19:3.000000000419334E-  
6,MicroT14:0.018438000000000176):0.006012999999999824):0.00432600000000002  
74):0.32577199999999973):0.09444600000000047):0.023753000000000135):0.0327  
9699999999952,((Lepto7376:0.29637199999999986,(Synec970:0.154473999999999  
56,(Synec7003:0.04281800000000002,(Synec7002:0.053830000000000044,Synec71  
17:1.999999998354667E-  
6):0.028713999999999906):0.07276399999999983):0.19018900000000016):0.30211  
699999999997,(((Cyano1200:0.11298800000000009,Cyano7202:0.05872000000000  
0105):0.23627199999999996,(Cyano10605:0.15698599999999985,(Gemin3708:0.091  
364,(Gemin3709:0.053496999999999684,Gemin6308:0.08310899999999988):0.019  
50900000000022):0.040455999999999825):0.09582599999999974):0.181414000000  
0002,(Gleo73106:0.38222500000000004,(MyxosGI1:0.50633600000000006,((Stani3

757:0.0616870000000005,Stani7437:0.04372599999999993):0.2219409999999997  
2,(Xenoc7305:0.49187399999999997,(Hyelpa:0.52476699999999998,(Chond4102:0.33  
799800000000024,Pleur7319:0.240383):0.265677999999999986):0.00857600000000  
0139):0.0617269999999999865):0.052719000000000626):0.13082399999999996):0.06  
203399999999997):0.03203900000000015):0.008414000000000144):0.115784999999  
9998):0.06343700000000041):0.080496999999999937):0.031136000000000053):0.05  
3303000000000544,(((Trich101:0.53151299999999995,((Kampt6407:0.120953000000  
00009,Oscil001:0.12470300000000023):0.162970999999999975,(Tychobou:0.090646  
99999999997,(MicroFGP2:0.03357700000000019,Oscil7112:0.012751000000000623  
):0.087366999999999953):0.226252999999999982):0.11280000000000001):0.0856640  
000000004,((Arthro:0.0045979999999999658,ArthrPara:0.023841):0.29361300000000  
0057,(Lyngb8106:0.16206199999999997,(Plank9631:0.037111000000000034,(Plankte  
pi:0.062377999999999982,(Plankrub:0.0071529999999999743,(Plank11201:0.0205570  
0000000016,Plank98:0.0134179999999999708):0.0593339999999999776):0.02054199  
99999999838):0.023870000000000502):0.200154999999999964):0.06723800000000005  
8):0.269364999999999963):0.046336000000000155,((Oxyne17:0.36521700000000003  
5,(Oscil10802:0.314054999999999975,(Oscilacum:0.285536000000000046,PlankSR00  
1:0.306154000000000026):0.040367999999999907):0.058972000000000069):0.062663  
99999999983,((Geitl7105:0.25531499999999995,Phrom10JO:0.43386199999999995):  
0.157933000000000077,(Prochholl:0.72342,(Synec7942:0.527728999999999999,(Synec  
307:0.377429000000000024,((Cyano6307:1.9999999998354667E-  
6,Synec8801:0.037088999999999993):0.26613,(((Cyano7001:0.0411259999999999774  
,Cyano981:0.072502000000000007):0.31153499999999997,(Synec8F6:0.10319799999  
99999,SynecGFB01:0.225312000000000018):0.104938999999999945):0.04502500000  
000076,(((Synec101C3:0.251962999999999994,SynecAce01:0.344450000000000014):  
0.048373999999999992,(Synec1G10:0.048926999999999994,Synec5701:0.056096000  
000000146):0.306807000000000005):0.056155999999999965,((Vulcalimn:0.20490799  
999999965,(Synec0101:0.122702000000000031,SynecXM24:0.19476899999999997):  
0.123351999999999968):0.114144000000000047,(((Synec9616:0.049093000000000005,  
SynecK100:0.0199749999999999632):0.0516770000000000195,((Synec8103:0.155136  
00000000016,SynecK49:0.12559800000000001):0.028356000000000048,((Synec107:  
0.0138660000000000156,Synec9902:0.01455200000000012):0.11981699999999984,(  
Synec9605:0.019883999999999979,SynecK52:0.037400000000000032):0.1004290000  
000001):0.06801199999999996):0.06446100000000001):0.119013000000000026,((Syn  
ec9916:0.149989999999999985,Synec9917:0.079701000000000002):0.113548999999  
999,((Propibact:0.051054999999999985,(Synec8016:0.011261000000000188,Synec80  
20:0.0200890000000000024):0.024773999999999985):0.096143000000000053,((Synec  
7803:0.068988000000000005,Synec7805:0.0215879999999999496):0.0785810000000  
0023,(Synec9504:2.000000000279556E-  
6,(Proch:0.316869999999999976,Proch1323:0.88134599999999997):2.692582):0.0888  
9900000000006):0.089739000000000024):0.025815999999999984):0.04819800000000  
0185):0.230957000000000008):0.0283409999999999283):0.060840000000000067):0.04  
241199999999967):0.196412000000000048):0.71862699999999997):0.2480310000000  
001):0.039296999999999947):0.09248200000000004):0.009967999999999755):0.0580  
4700000000018):0.018574000000000009):0.0163070000000000293):0.0434529999999  
9952):0.066042000000000038):0.26555600000000001):0.417174);

Criteria values before the computation :

Robinson and Foulds distance (RF) = 218

Least-squares coefficient(LS) = 285.010

Bipartition dissimilarity = 443.0

Bootstrap values were computed with 1 gene trees

HGT results:

1 Regular (bootstrap value = 100.0% inverse = 100.0%)

From subtree (Hyelpa) to subtree (Chond4102, Pleur7319)

RF = 214 , LS = 281.052 , BD = 439.5

rRF = 216 , rLS = 281.096 , rBD = 440.5

2 Regular (bootstrap value = 100.0% inverse = 100.0%)

From subtree (Cyano7424, Gloeoverr) to subtree (Micro7806, Micro843, MicroMC19, MicroT14)

RF = 214 , LS = 280.745 , BD = 437.0

rRF = 216 , rLS = 280.764 , rBD = 439.0

3 Regular (bootstrap value = 100.0% inverse = 100.0%)

From subtree (Plank98) to subtree (Plank11201)

RF = 214 , LS = 281.091 , BD = 440.0

rRF = 216 , rLS = 281.102 , rBD = 441.0

4 Regular (bootstrap value = 100.0% inverse = 100.0%)

From subtree (Gemin3708, Gemin3709, Gemin6308) to subtree (Cyano10605)

RF = 216 , LS = 281.044 , BD = 442.0

rRF = 216 , rLS = 281.096 , rBD = 442.0

5 Regular (bootstrap value = 100.0% inverse = 100.0%)

From subtree (Synec7117) to subtree (Synec7002)

RF = 216 , LS = 281.105 , BD = 441.5

rRF = 216 , rLS = 281.116 , rBD = 441.5

6 Regular (bootstrap value = 100.0% inverse = 100.0%)

From subtree (Rippk8801) to subtree (endosEpith)

RF = 216 , LS = 281.046 , BD = 439.5

rRF = 216 , rLS = 281.055 , rBD = 439.5

7 Regular (bootstrap value = 100.0% inverse = 100.0%)

From subtree (Croco8501) to subtree (Cyano51142)

RF = 216 , LS = 281.122 , BD = 442.0

rRF = 216 , rLS = 281.122 , rBD = 442.0

8 Regular (bootstrap value = 100.0% inverse = 100.0%)

From subtree (Horm202) to subtree (RoseoAO1A)

RF = 216 , LS = 281.170 , BD = 442.0

rRF = 216 , rLS = 281.113 , rBD = 442.0

9 Regular (bootstrap value = 100.0% inverse = 100.0%)

From subtree (PseudG53) to subtree (Pseud1403)

RF = 216 , LS = 281.226 , BD = 442.0

rRF = 216 , rLS = 281.122 , rBD = 442.0

10 Regular (bootstrap value = 100.0% inverse = 100.0%)

From subtree (Pseud6802, Pseud7367) to subtree (Synec7502)

RF = 172 , LS = 278.762 , BD = 399.5

rRF = 174 , rLS = 279.169 , rBD = 400.5

11 Regular (bootstrap value = 100.0% inverse = 100.0%)

From subtree (Chond4102, Hyelpa, Pleur7319, Xenoc7305) to subtree (Stani3757, Stani7437)

RF = 174 , LS = 279.018 , BD = 400.5

rRF = 174 , rLS = 279.043 , rBD = 400.5

12 Regular (bootstrap value = 100.0% inverse = 100.0%)

From subtree (Lyngb8106) to subtree (Plank11201, Plank9631, Plank98, Plankrub, Planktepi)

RF = 160 , LS = 278.588 , BD = 392.0

rRF = 160 , rLS = 278.585 , rBD = 392.0

13 Regular (bootstrap value = 100.0% inverse = 100.0%)

From subtree (filamESFC1) to subtree (Spiruma)

RF = 148 , LS = 276.880 , BD = 383.0

rRF = 150 , rLS = 278.965 , rBD = 385.0

14 Regular (bootstrap value = 100.0% inverse = 100.0%)

From subtree (Moore3L, Mooreprod) to subtree (Symp2G7)

RF = 150 , LS = 274.225 , BD = 378.5

rRF = 152 , rLS = 280.402 , rBD = 391.5

15 Regular (bootstrap value = 100.0% inverse = 100.0%)

From subtree (Calot2098) to subtree (Calot2100)

RF = 150 , LS = 274.127 , BD = 381.0

rRF = 152 , rLS = 279.801 , rBD = 386.5

16 Regular (bootstrap value = 100.0% inverse = 100.0%)

From subtree (Chrooc3979) to subtree (Mastitest)

RF = 152 , LS = 243.493 , BD = 377.0

rRF = 152 , rLS = 310.073 , rBD = 391.5

17 Regular (bootstrap value = 100.0% inverse = 100.0%)

From subtree (Chroo1203, Chroo821, Chrooside, Gloeo1H9) to subtree (Calotpara, Rivul7116)

RF = 152 , LS = 191.594 , BD = 362.0

rRF = 154 , rLS = 344.629 , rBD = 395.5

18 Regular (bootstrap value = 100.0% inverse = 100.0%)

From subtree (Anaba7108, TrichN1) to subtree (Calot6303)

RF = 152 , LS = 275.052 , BD = 380.0

rRF = 154 , rLS = 277.622 , rBD = 381.5

19 Regular (bootstrap value = 100.0% inverse = 100.0%)

From subtree (Nosto2108, Nosto53789, NostoK20, NostoLoba, Nostocomm, Nostopunc, Nostospha) to subtree (Nosto43529, Nostolinc)

RF = 152 , LS = 276.150 , BD = 374.0

rRF = 152 , rLS = 276.200 , rBD = 367.5

20 Regular (bootstrap value = 100.0% inverse = 100.0%)

From subtree (Anaba7122) to subtree (Sphaekiss)

RF = 152 , LS = 277.588 , BD = 379.0

rRF = 152 , rLS = 278.197 , rBD = 387.5

21 Regular (bootstrap value = 100.0% inverse = 100.0%)

From subtree (Fisch9605) to subtree (Calot4105, Calot7103)

RF = 152 , LS = 278.158 , BD = 384.0

rRF = 152 , rLS = 278.112 , rBD = 384.0

22 Regular (bootstrap value = 100.0% inverse = 100.0%)

From subtree (Nosto4103, NostoN26) to subtree (AnabaN21, Nosto7107)

RF = 90 , LS = 163.884 , BD = 275.0

rRF = 92 , rLS = 157.978 , rBD = 267.5

23 Regular (bootstrap value = 100.0% inverse = 100.0%)

From subtree (Alkal70d, Lepto2104, Lepto3755, Leptodg5) to subtree (Limno13C2)

RF = 90 , LS = 161.769 , BD = 273.5

rRF = 92 , rLS = 162.341 , rBD = 273.5

24 Regular (bootstrap value = 100.0% inverse = 100.0%)

From subtree (AphanFPU1, Chond4102, Croco8501, Cyano10605, Cyano1200, Cyano51142, Cyano7202, Cyano7424, Gemin3708, Gemin3709, Gemin6308, Gloeo73106, Gloeoverr, Hydrriyu, Hyelpa, Lepto7376, Micro7806, Micro843, MicroMC19, MicroT14, MyxosGI1, Pleur7319, Pleurmino, Rippk8801, Stani3757, Stani7437, Synec6714, Synec6803, Synec7002, Synec7003, Synec7117, Synec970, Xenoc7305, endosEpith, uniceSU3) to subtree (Spiruma, filamESFC1)

RF = 92 , LS = 162.247 , BD = 274.5

rRF = 92 , rLS = 162.915 , rBD = 274.5

25 Regular (bootstrap value = 100.0% inverse = 100.0%)

From subtree (Calot3974, Riche, Riche01) to subtree (Anaba7108, Calot6303, TrichN1)

RF = 68 , LS = 123.428 , BD = 225.0

rRF = 68 , rLS = 136.164 , rBD = 230.5

26 Regular (bootstrap value = 100.0% inverse = 100.0%)

From subtree (Calot3363, Calot4105, Calot7103, Chlor6912, Fisch9605, FischJSC11, cyano7702) to subtree (Mastirepe, Nosto582, ScytoHK05, Tolyp1301)

RF = 70 , LS = 132.013 , BD = 238.5

rRF = 70 , rLS = 132.433 , rBD = 238.5

27 Regular (bootstrap value = 100.0% inverse = 100.0%)

From subtree (Halom2206, Lepto7375, PhormAna, Synec7335) to subtree (Lepto6406, Lyngb1951)

RF = 70 , LS = 131.858 , BD = 238.5

rRF = 70 , rLS = 131.867 , rBD = 238.5

28 Regular (bootstrap value = 100.0% inverse = 100.0%)

From subtree (Proch, Proch1323, Synec107, Synec7803, Synec7805, Synec8016, Synec8020, Synec8103, Synec9504, Synec9605, Synec9616, Synec9902, Synec9916, Synec9917, SynecK100, SynecK49, SynecK52) to subtree (Synec0101, SynecXM24, Vulcalimn)

RF = 58 , LS = 94.356 , BD = 192.0

rRF = 58 , rLS = 89.394 , rBD = 191.5

29 Regular (bootstrap value = 100.0% inverse = 100.0%)

From subtree (Chamaminu, Crina9333) to subtree (AphanFPU1, Chond4102, Croco8501, Cyano10605, Cyano1200, Cyano51142, Cyano7202, Cyano7424, Dacty8305, Euhalna, Gemin3708, Gemin3709, Gemin6308, Gloeo73106, Gloeoverr, Halot7418, Hydrvivu, Hyelpa, Lepto7376, Micro7806, Micro843, MicroMC19, MicroT14, MyxosGI1, Pleur7319, Pleurmino, Rippk8801, Rubila, Spiruma, Stani3757, Stani7437, Synec6714, Synec6803, Synec7002, Synec7003, Synec7117, Synec970, Xenoc7305, endosEpith, filamESFC1, uniceSU3)

RF = 60 , LS = 94.974 , BD = 199.5

rRF = 60 , rLS = 93.530 , rBD = 197.0

30 Regular (bootstrap value = 100.0% inverse = 100.0%)

From subtree (Calot3363, Calot4105, Calot7103, Chlor6912, Fisch9605, FischJSC11, Mastirepe, Nosto582, ScytoHK05, Scytotoly, Tolyp1301, cyano7702) to subtree (Scyto2349)

RF = 60 , LS = 95.008 , BD = 195.0

rRF = 60 , rLS = 95.423 , rBD = 195.0

31 Regular (bootstrap value = 100.0% inverse = 100.0%)

From subtree (Nosto7120, Nostoc) to subtree (Anaba33047, Nosto7524)

RF = 60 , LS = 93.929 , BD = 198.0

rRF = 60 , rLS = 93.926 , rBD = 198.0

32 Regular (bootstrap value = 100.0% inverse = 100.0%)



From subtree (Halom2206, Lepto6406, Lepto7375, LeptoK1, Lyngb1951, PhormAna, Synec7335) to subtree (LeptoO77, OscilMTP1)

RF = 60 , LS = 95.755 , BD = 198.0

rRF = 60 , rLS = 95.964 , rBD = 200.5

33 Regular (bootstrap value = 100.0% inverse = 100.0%)

From subtree (Geitl7407) to subtree (Alkal70d, Lepto2104, Lepto3755, Leptodg5, Limno13C2, Oscil12)

RF = 62 , LS = 96.295 , BD = 198.0

rRF = 62 , rLS = 96.053 , rBD = 199.5

34 Regular (bootstrap value = 100.0% inverse = 100.0%)

From subtree (Cyano6307, Cyano7001, Cyano981, Geitl7105, Oscil10802, Oscilacum, Oxyne17, Phrom10JO, PlankSR001, Proch, Proch1323, Prochholl, Synec0101, Synec101C3, Synec107, Synec1G10, Synec307, Synec5701, Synec7803, Synec7805, Synec7942, Synec8016, Synec8020, Synec8103, Synec8801, Synec8F6, Synec9504, Synec9605, Synec9616, Synec9902, Synec9916, Synec9917, SynecAce01, SynecGFB01, SynecK100, SynecK49, SynecK52, SynecXM24, Vulcalimn) to subtree (ArthrPara, Arthro, Kampt6407, Lyngb8106, MicroFGP2, Oscil001, Oscil7112, Plank11201, Plank9631, Plank98, Plankrub, Planktepi, Trich101, Tychobou)

RF = 22 , LS = 54.614 , BD = 95.5

rRF = 22 , rLS = 54.704 , rBD = 95.5

35 Regular (bootstrap value = 100.0% inverse = 100.0%)

From subtree (Calot2098, Calot2100, Calot7507, Forticont, Fremy3275, Nostoc106, Nostocarn, Tolyp7101) to subtree (Anaba33047, AnabaN21, Calot3363, Calot4105, Calot7103, Chlor6912, Fisch9605, FischJSC11, Mastirepe, Nodul3585, Nodulpum, Nosto4103, Nosto582, Nosto7107, Nosto7120, Nosto7524, NostoN26, Nostoc, Scyto2349, ScytoHK05, Scytotoly, Tolyp1301, cyano7702)

RF = 18 , LS = 30.584 , BD = 91.5

rRF = 18 , rLS = 30.374 , rBD = 91.5

36 Regular (bootstrap value = 100.0% inverse = 100.0%)

From subtree (Nosto2108, Nosto43529, Nosto53789, NostoK20, NostoLoba, Nostocomm, Nostolinc, Nostopunc, Nostospha) to subtree (Anaba33047, AnabaN21,

Calot2098, Calot2100, Calot3363, Calot4105, Calot7103, Calot7507, Chlor6912, Fisch9605, FischJSC11, Forticont, Fremy3275, Mastirepe, Nodul3585, Nodulspum, Nosto4103, Nosto582, Nosto7107, Nosto7120, Nosto7524, NostoN26, Nostoc, Nostoc106, Nostocarn, Scyto2349, ScytoHK05, Scytotoly, Tolyp1301, Tolyp7101, cyano7702)

RF = 14 , LS = 17.092 , BD = 33.0

rRF = 14 , rLS = 16.630 , rBD = 33.0
